# Supplementary material for: Metabolic, Phenotypic, and Neuropathological Characterization of the Tg4-42 Mouse Model for Alzheimer’s Disease
Source: PubMed Central journal article supplement — J Alzheimers Dis. 2021 Apr 6;80(3):1151–68. doi: 10.3233/JAD-201204 (PMC8150512; doi:10.3233/jad-201204), 2021-04-06
Supplement: jad-80-jad201204-s001.pdf [file jad-80-jad201204-s001.pdf]

# Supplementary Material

## Metabolic, Phenotypic, and Neuropathological Characterization of the Tg4-42 Mouse Model for Alzheimer's Disease

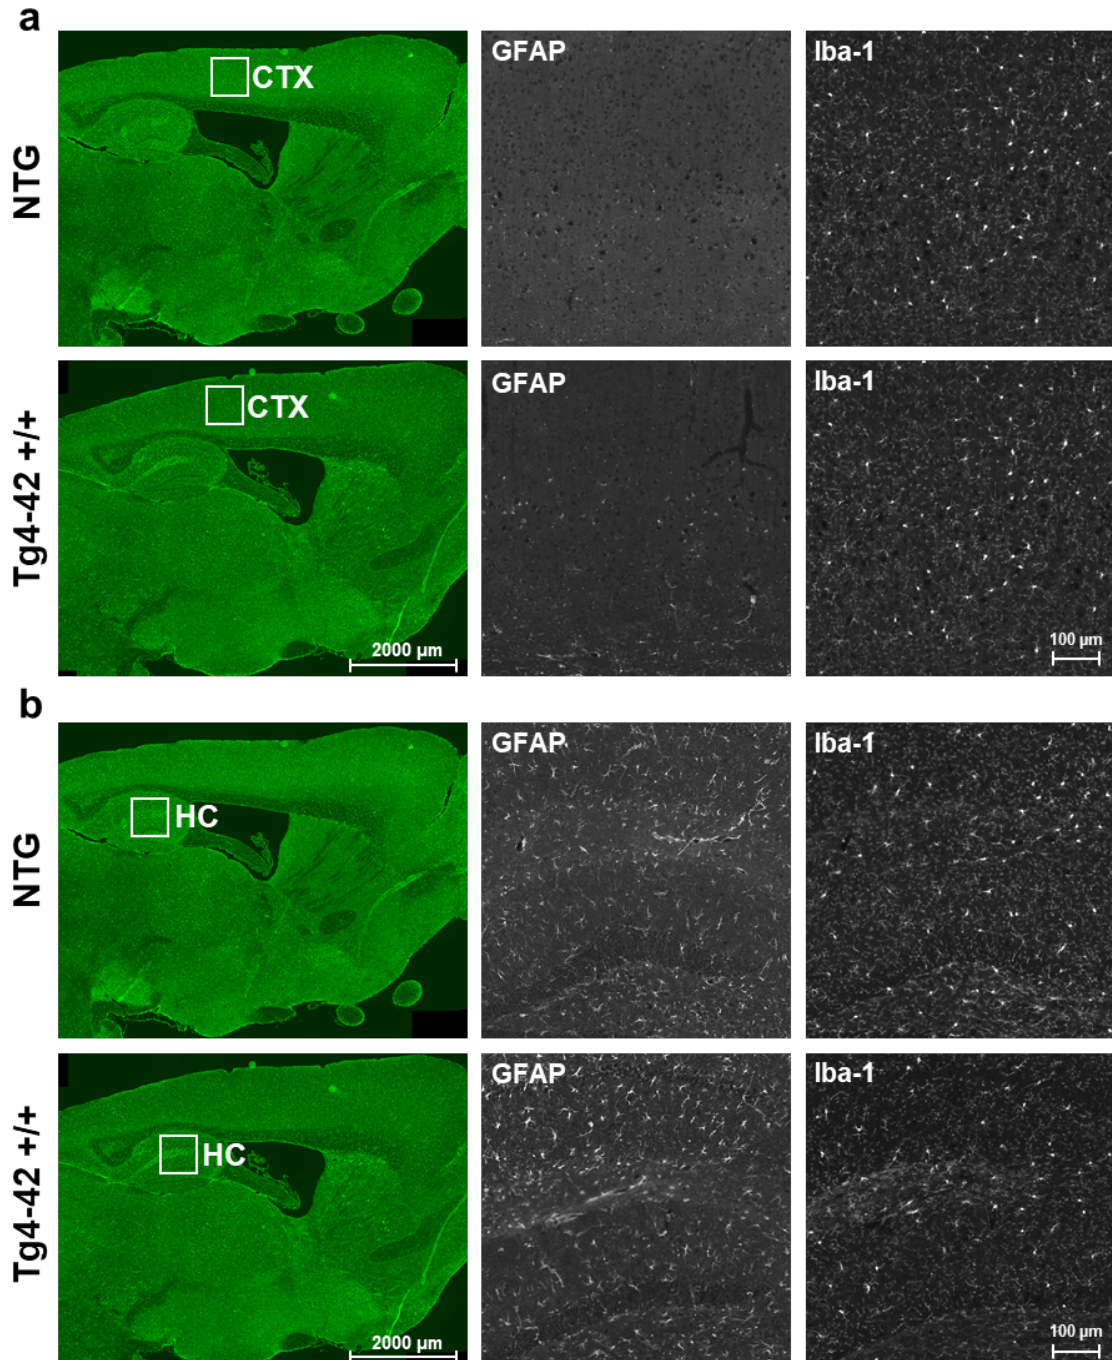

**Supplementary Figure 1. Neuroinflammation in 9-month-old Tg4-42 +/+ mice.** a) Representative images of GFAP and Iba-1 labeling of cortex samples in 9-month-old Tg4-42 +/+ and non-transgenic mice (NTG). b) Representative images of GFAP and Iba-1 labeling of hippocampus samples in 9-month-old Tg4-42 +/+ and non-transgenic mice (NTG). Scale bars: 2.000 μm for all overview images. 100 μm for all detailed images.

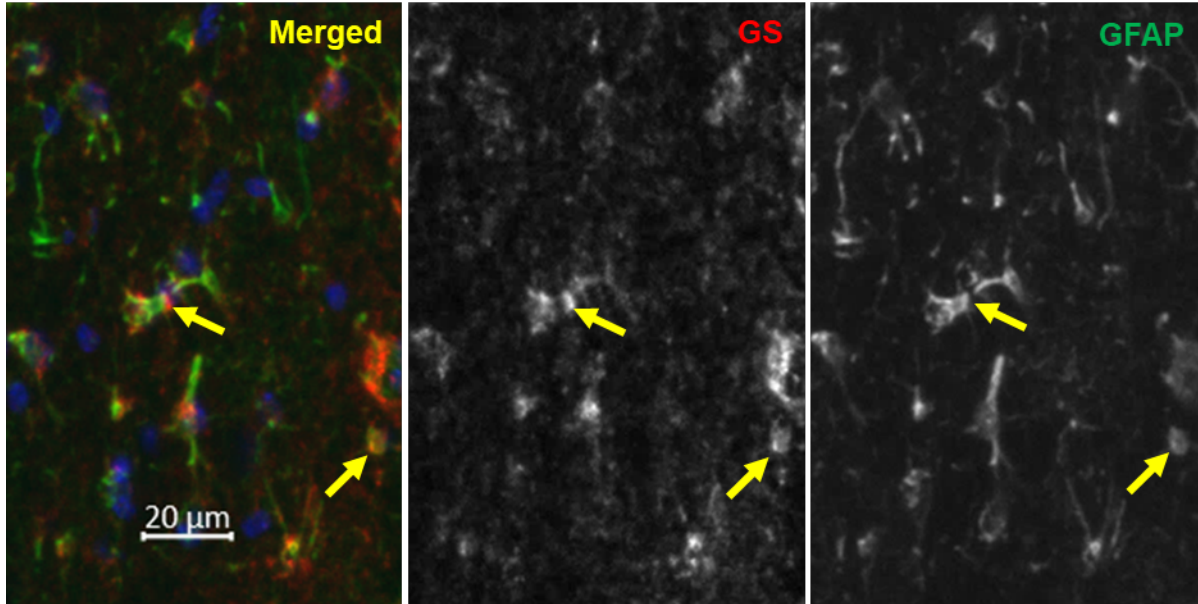

**Supplementary Figure 2. Expression of glutamine synthetase in astrocytes.** Representative images of glutamine synthetase (GS) and GFAP in the hippocampal CA1 area. Arrows indicate GS expression mainly in astrocytes (co-labeling). Scale bar 20  $\mu\text{m}$ .

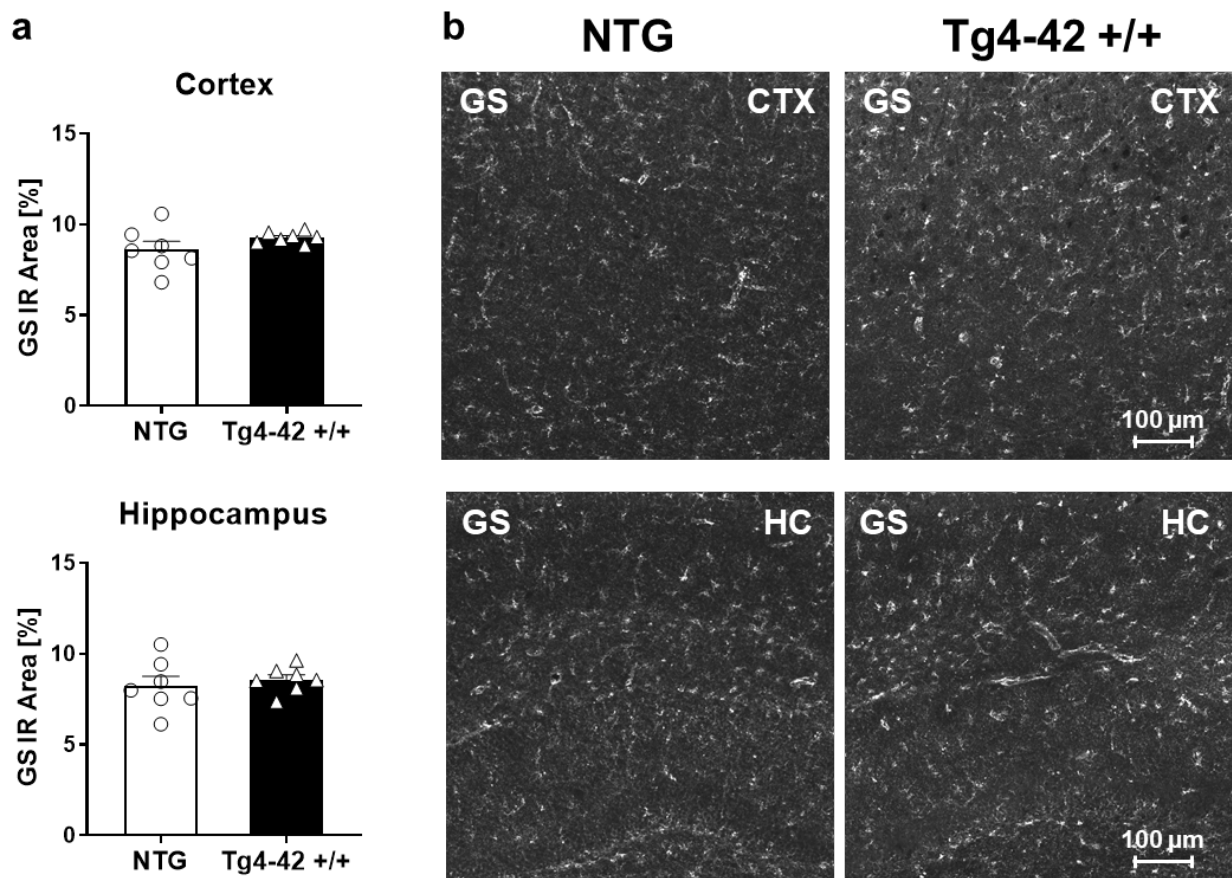

**Supplementary Figure 3. Expression of glutamine synthetase in 9-month-old Tg4-42 +/+ mice.** a) Quantification of GS expression in the cortex (CTX) and hippocampus (HC) shown as immunoreactive (IR) area in percent. b) Representative images of NTG and Tg4-42 +/+ brain sections. Scale bar 100  $\mu$ m for all images.  $n = 7$  per group. Mean + SEM. Unpaired t-test.
